# Supplementary material for: A homochiral magnet based on D3 symmetric [(NaO3)Co3] clusters: from spontaneous resolution to absolute chiral induction
Source: Royal Society of Chemistry journal article supplement (doi:10.1039/c5cc00003c), 2015-01-01
Supplement: c5cc00003c1.pdf [file c5cc00003c1.pdf]

COMMUNICATION

Entry for the Table of Contents:

**A Homochiral Magnet Based on  $D_3$  Symmetric  $[(NaO_3)Co_3]$  Clusters: from Spontaneous Resolution to Absolute Chiral Induction**

Ru-Xin Yao, Xin Cui, Jun Wang, and Xian-Ming Zhang\*

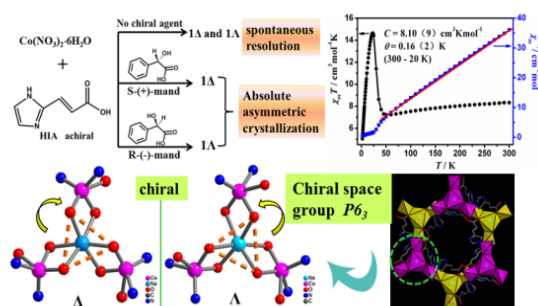

A pair novel chiral magnet have been synthesized using the achiral ligand *via* spontaneous resolution, in which the star-shaped  $D_3$  symmetric chiral  $[(NaO_6)Co_3]$  clusters act as nodes. By using chiral induction agent, they are driven to controllable homochiral crystallization of the desired enantiomorph.
